# Supplementary material for: Argentivorous molecules with chromophores: dependence of their fluorescence intensities on the distance between a donor and an acceptor
Source: Royal Society of Chemistry journal article supplement (doi:10.1039/d2dt01581a), 2022-01-01
Supplement: d2dt01581a4.pdf [file d2dt01581a4.pdf]

## Electronic Supplementary Information

# Argentivorous Molecules with Chromophores: Dependence of Fluorescence Intensity on the Distance between Donor and Acceptor

Huiyeong Ju,<sup>a</sup> Takao Hiraoka,<sup>a</sup> Hiroki Horita,<sup>a</sup> Eunji Lee,<sup>a</sup> Mari Ikeda,<sup>c</sup> Shunsuke Kuwahara,<sup>ab</sup>  
and Yoichi Habata\*<sup>ab</sup>

<sup>a</sup>*Department of Chemistry and* <sup>b</sup>*Research Centre for Materials with Integrated Properties,*  
*Faculty of Science, Toho University, 2-2-1Miyama, Funabashi, Chiba 274-8510, Japan*

<sup>c</sup>*Department of Chemistry, Education Center, Faculty of Engineering, Chiba Institute of*  
*Technology, 2-1-1 Shibazono, Narashino, Chiba 275-0023, Japan*

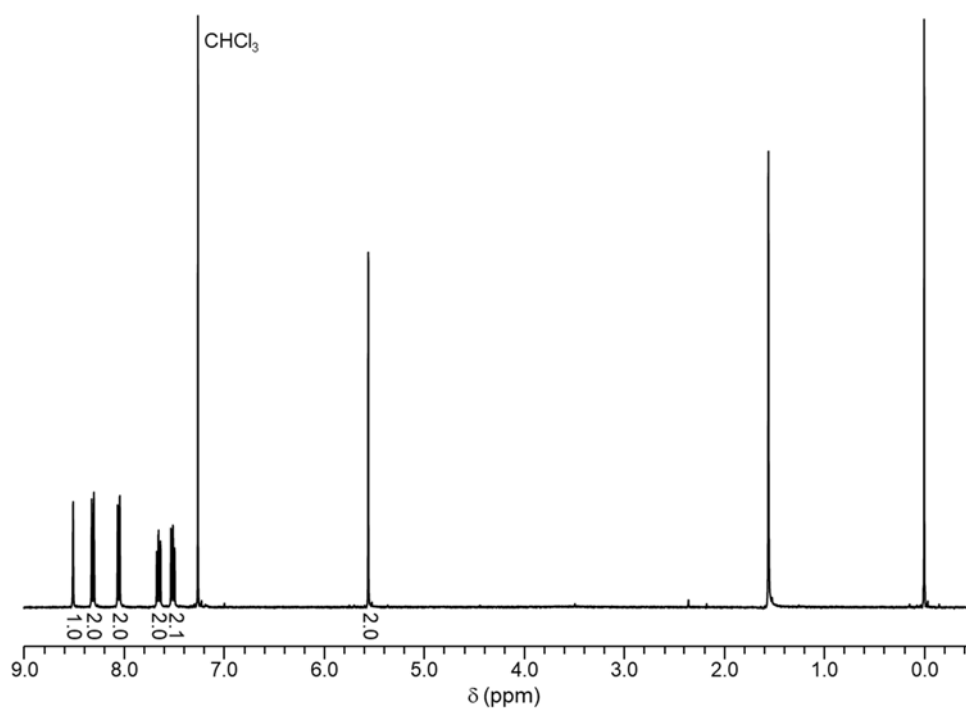

**Fig. S1.**  $^1\text{H}$  NMR spectrum of **2** in  $\text{CDCl}_3$ .

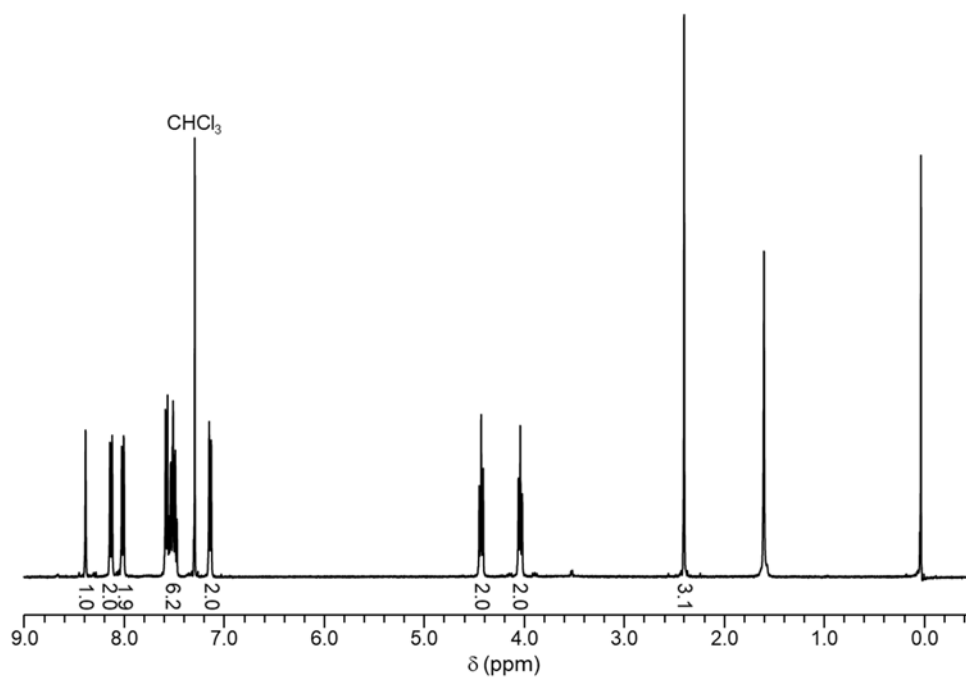

**Fig. S2.**  $^1\text{H}$  NMR spectrum of **3** in  $\text{CDCl}_3$ .

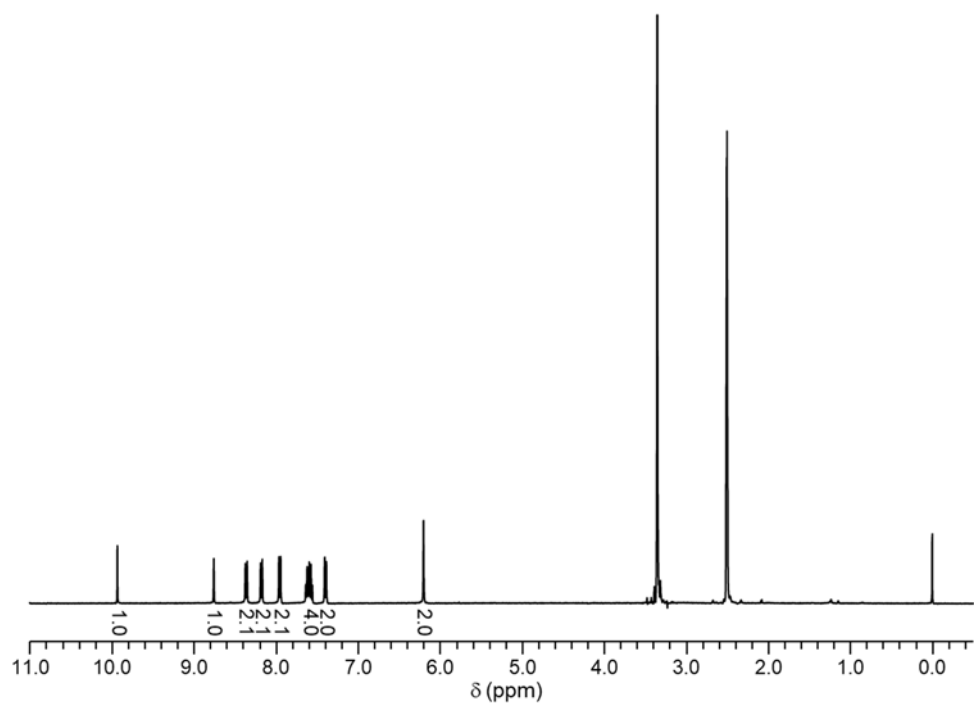

(a)

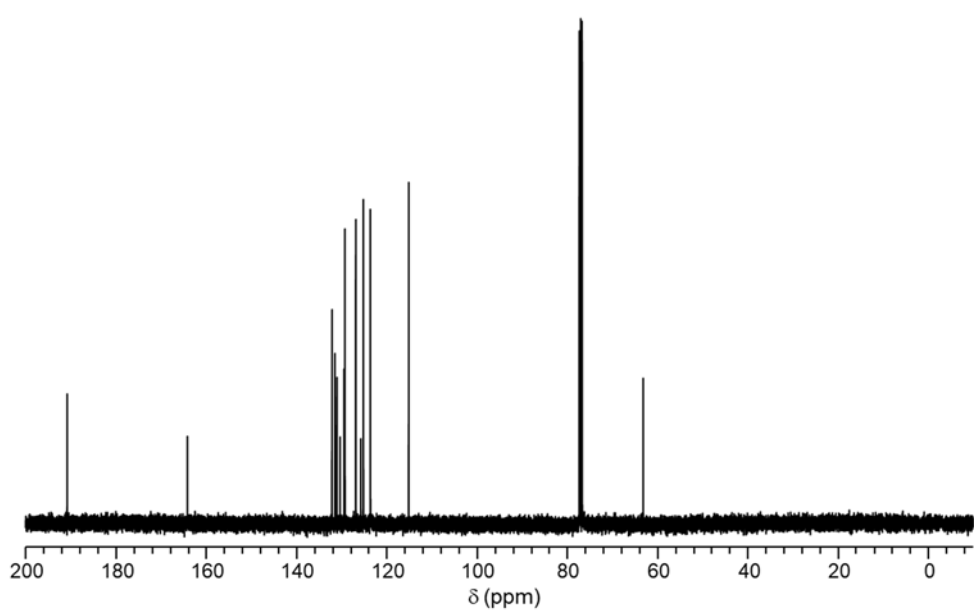

(b)

**Fig. S3.** (a)  $^1\text{H}$  (in  $\text{DMSO-}d_6$ ) and (b)  $^{13}\text{C}$  (in  $\text{CDCl}_3$ ) NMR spectra of **5**.

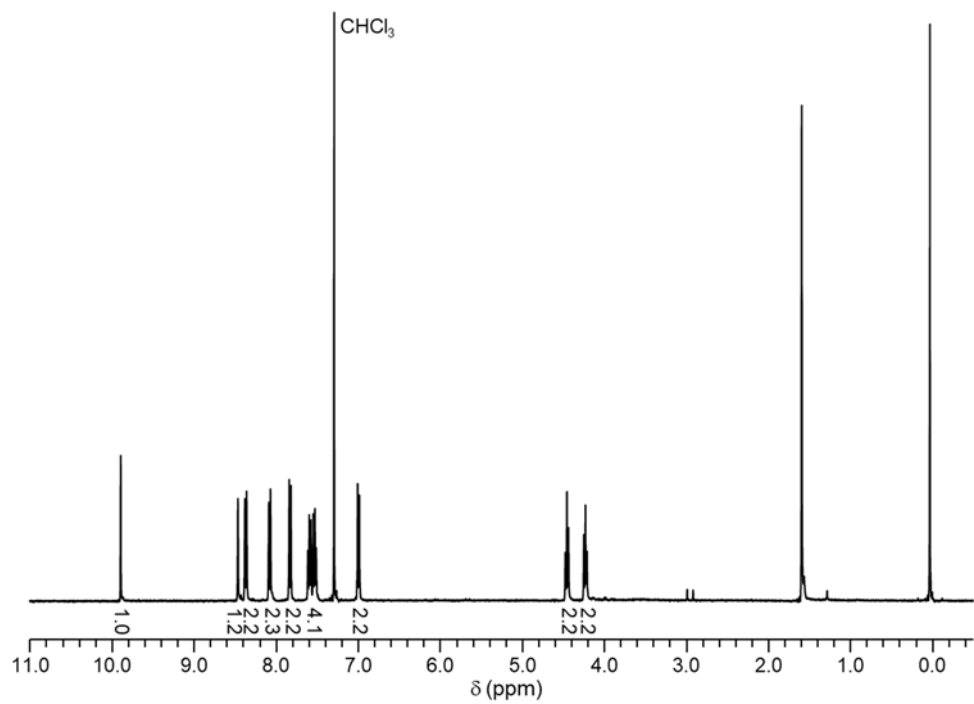

(a)

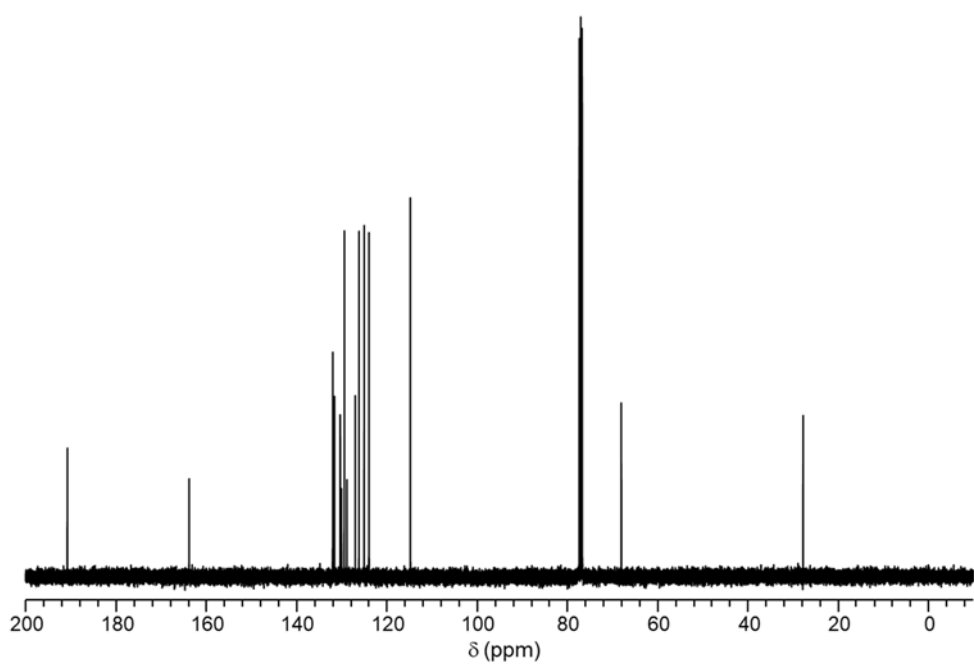

(b)

**Fig. S4.** (a)  $^1\text{H}$  and (b)  $^{13}\text{C}$  NMR spectra of **6** in  $\text{CDCl}_3$ .

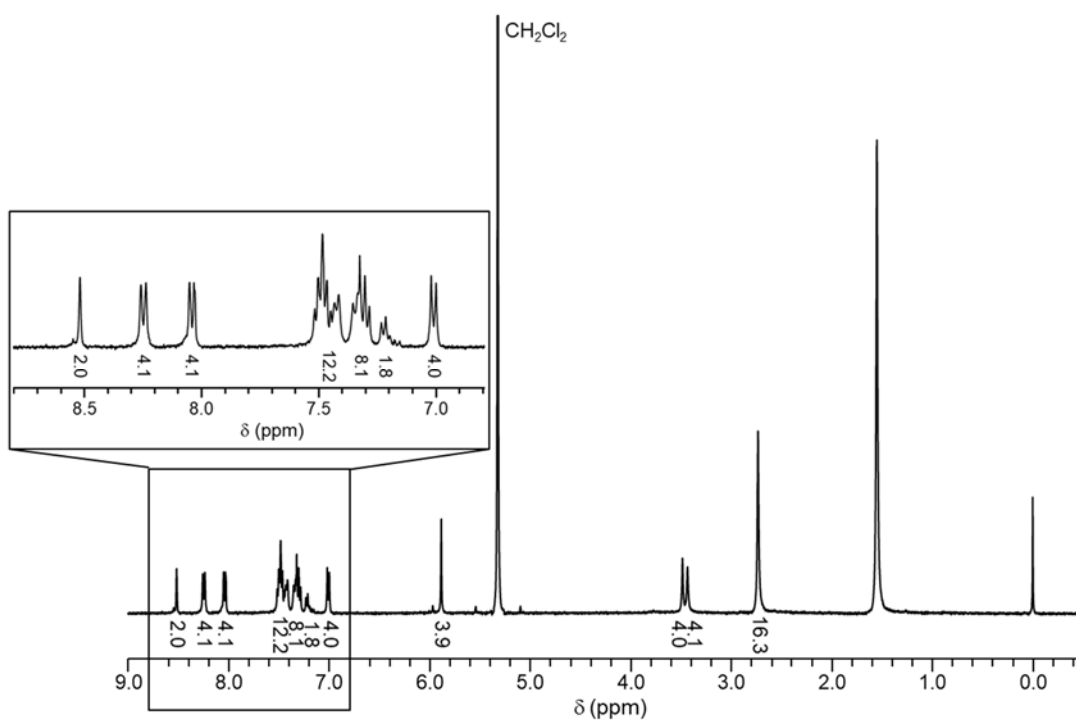

(a)

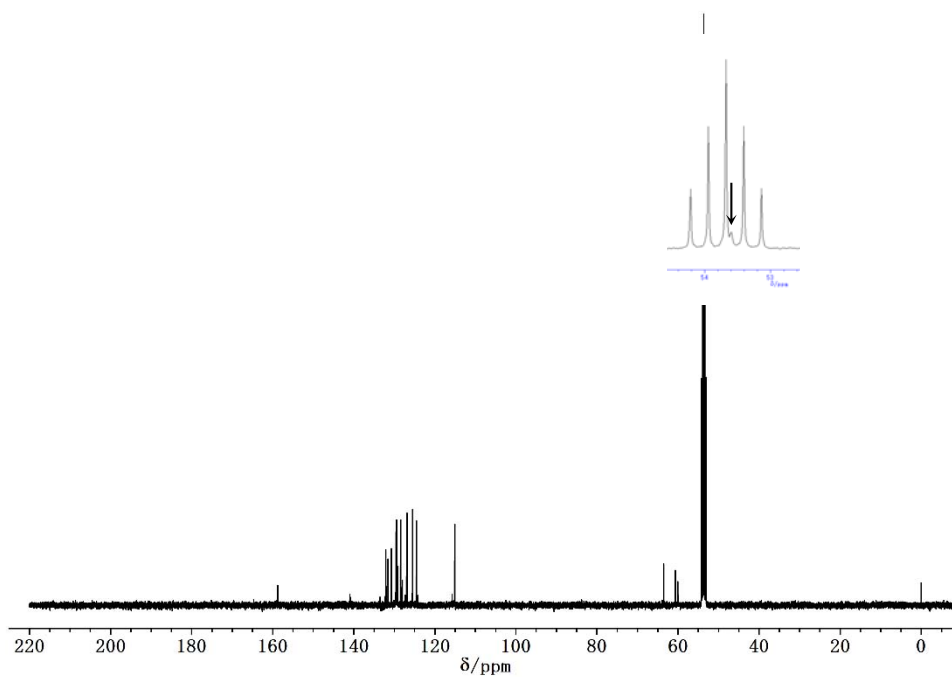

(b)

**Fig. S5.** (a)  $^1\text{H}$  NMR and (b)  $^{13}\text{C}$  NMR of  $\text{L}^2$  in  $\text{CD}_2\text{Cl}_2$ .

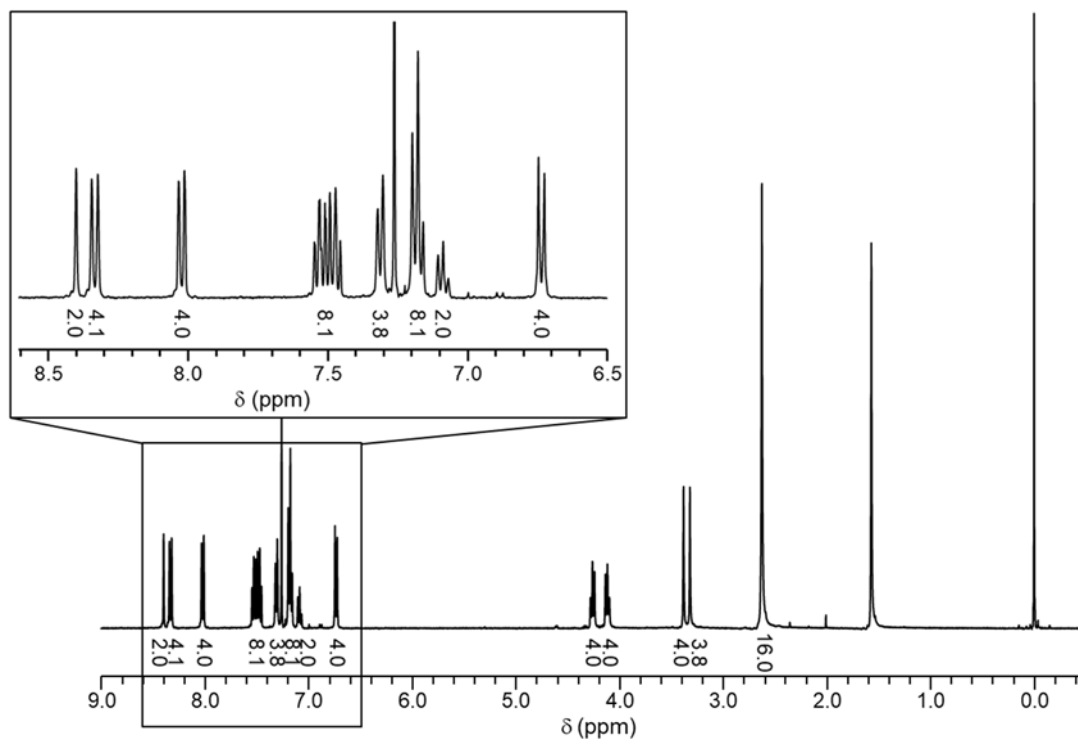

(a)

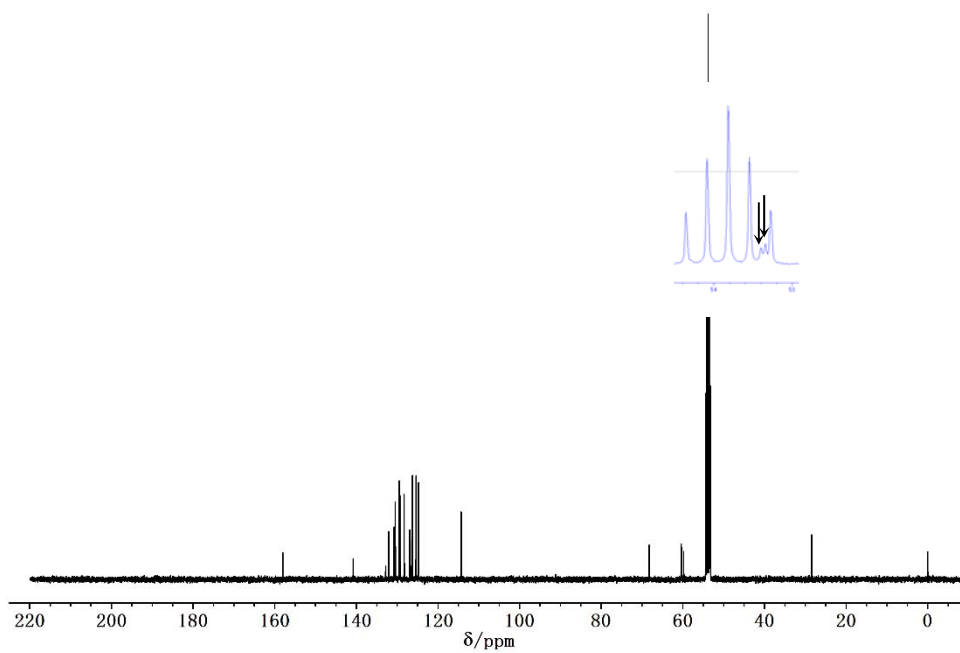

(b)

**Fig. S6.** (a)  $^1\text{H}$  NMR (in  $\text{CDCl}_3$ ) and (b)  $^{13}\text{C}$  NMR (in  $\text{CD}_2\text{Cl}_2$ ) of  $\text{L}^3$ .

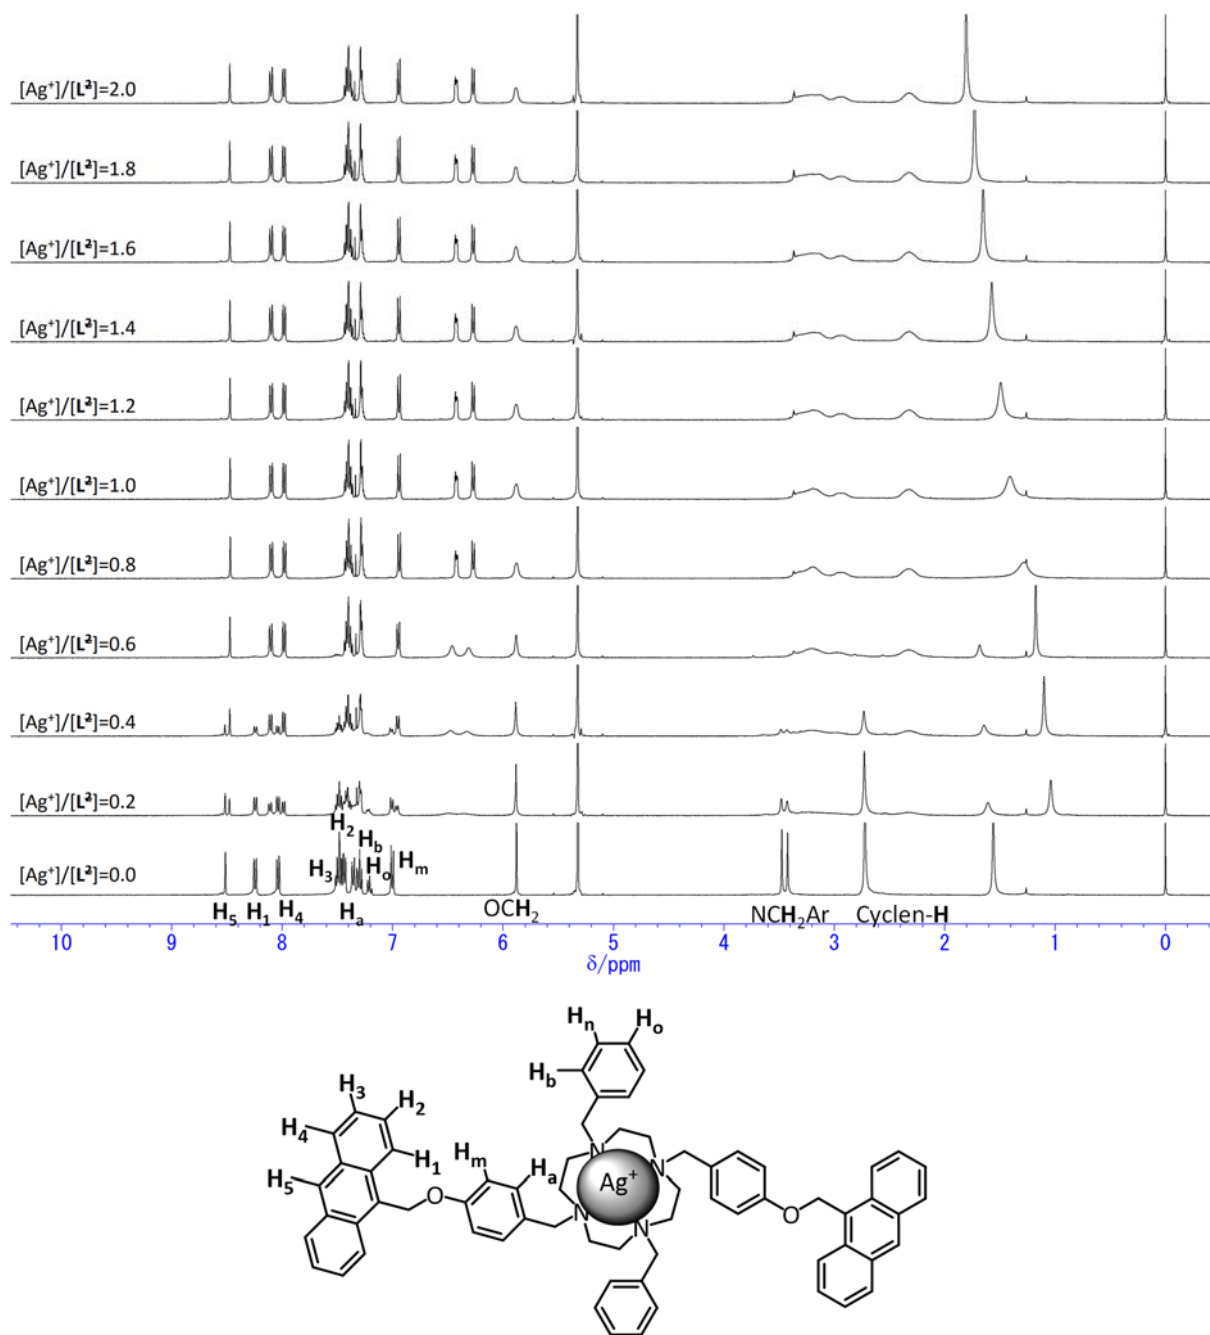

**Fig. S7**  $\text{Ag}^+$  ion-induced  $^1\text{H}$  NMR spectral changes of  $\text{L}^2$  in  $\text{CD}_2\text{Cl}_2/\text{CD}_3\text{OD}$ . ( $[\text{L}^2] = 5.0 \times 10^{-5} \text{ M}$ ).

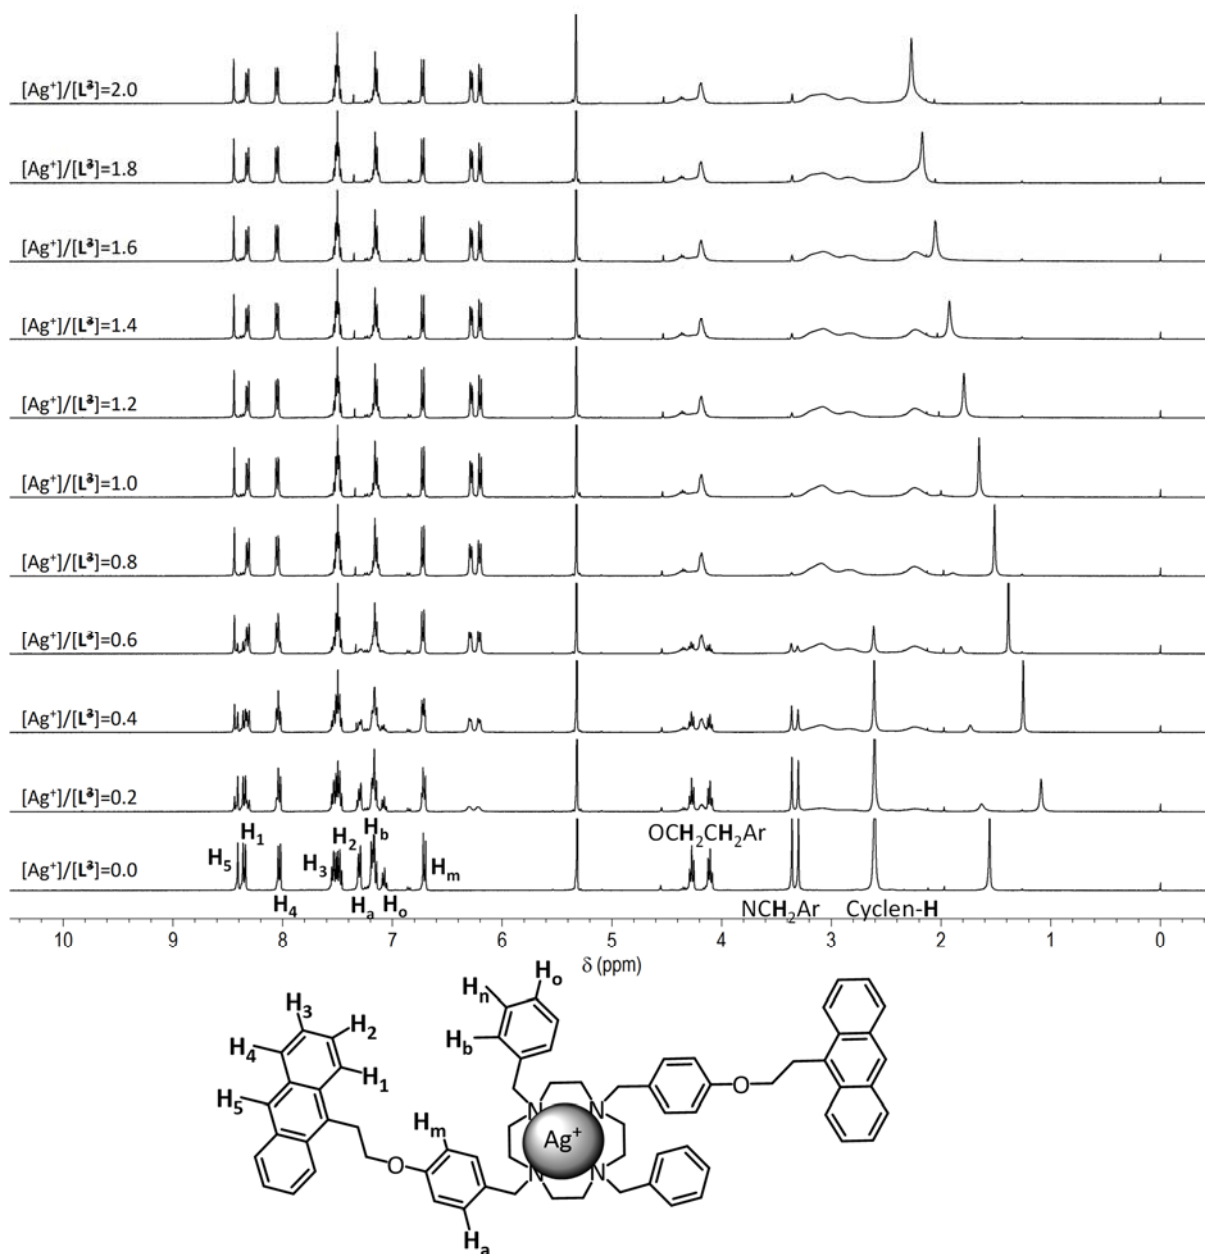

**Figure S8.**  $\text{Ag}^+$  ion-induced  $^1\text{H}$  NMR spectral changes of  $\text{L}^3$  in  $\text{CD}_2\text{Cl}_2/\text{CD}_3\text{OD}$  ( $[\text{L}^3] = 5.0 \times 10^{-5}$  M).



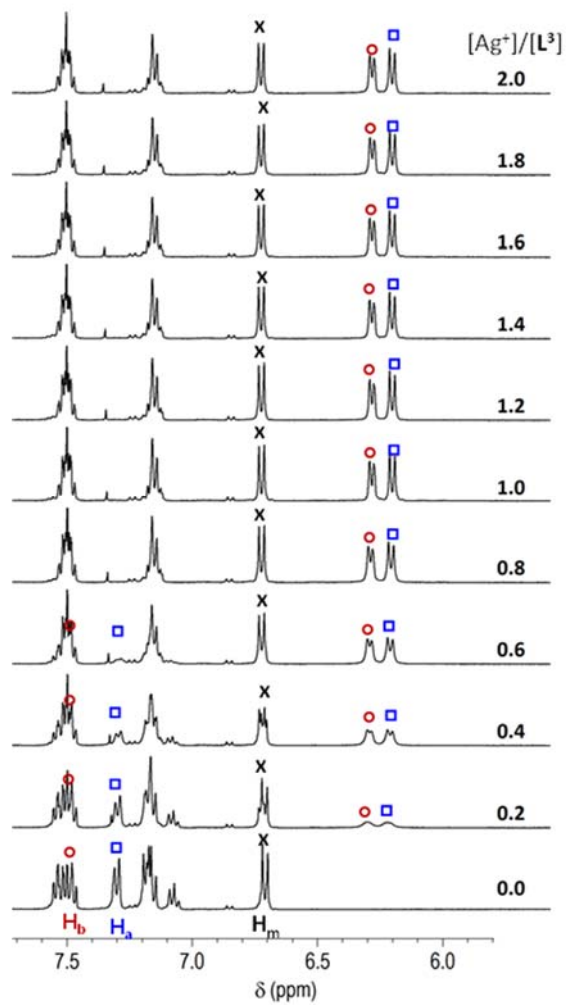

**Fig. S9.** <sup>1</sup>H NMR spectral changes of  $\text{L}^3$  depending on the addition of AgOTf in  $\text{CD}_2\text{Cl}_2/\text{CD}_3\text{OD}$  ( $[\text{L}^2]$  and  $[\text{L}^3] = 5.0 \times 10^{-5} \text{ M}$ ). The chemical shift at the 2,6-positions of the phenyl groups was predicted to appear at higher fields.

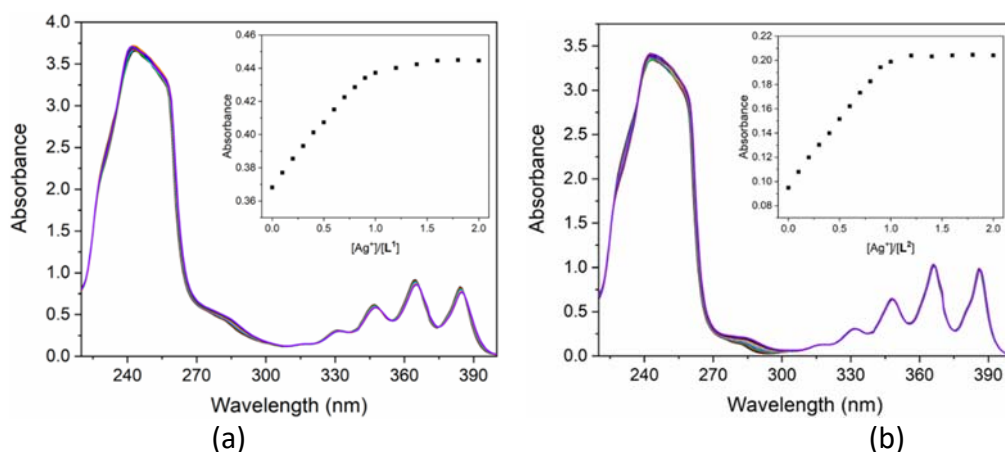

**Fig. S10.** Ag(I)-induced UV-vis spectral changes of (a)  $L^2$  and (b)  $L^3$  in  $CHCl_3/MeOH$  (1:19,  $[L^2]$  and  $[L^3] = 5.0 \times 10^{-5} M$ ). The insets show the absorbance at 290 nm.

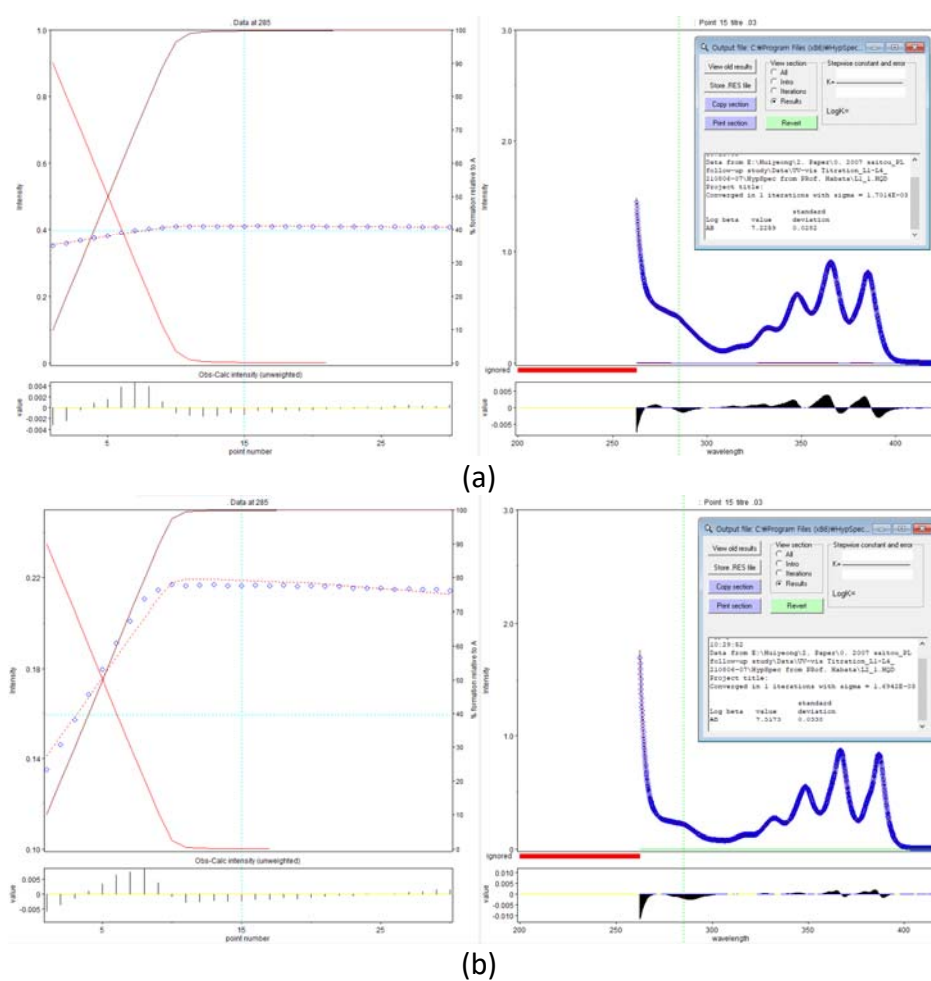

**Fig. S11.** HypSpec™ output for UV-Vis spectral titration of  $L$  upon addition of silver(I) triflate in  $CHCl_3/MeOH$  (1:19): (a)  $[L^2] = 5.0 \times 10^{-5} M$  and (b)  $[L^3] = 5.0 \times 10^{-5} M$ .

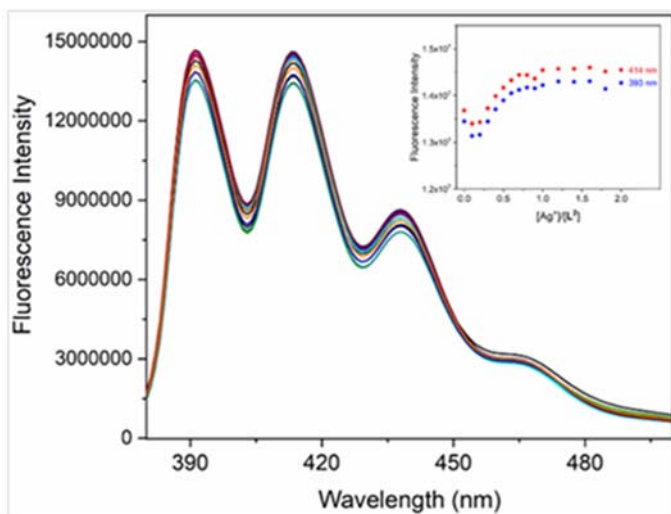

**Fig. S12** Ag(I)-induced fluorescence spectral changes of  $L^2$  in THF. ( $[L^2] = 2.0 \times 10^{-7}$  M).  $\lambda_{ex}=363$  nm

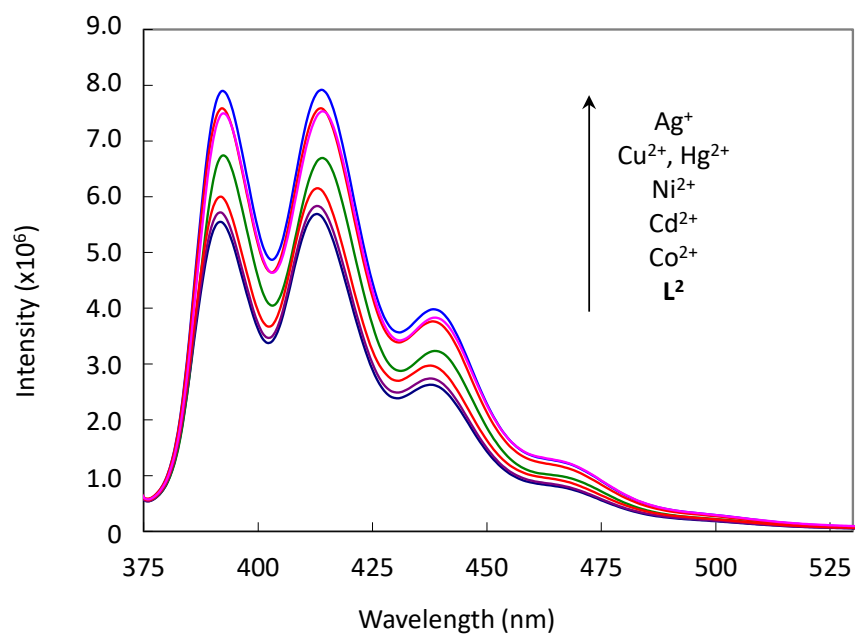

**Fig. S13.** Metal ion-induced fluorescence spectral changes of  $L^3$  in THF.  $[L^3]=[metal\ ion]=2.0 \times 10^{-7}$  M.  $\lambda_{ex}=363$  nm

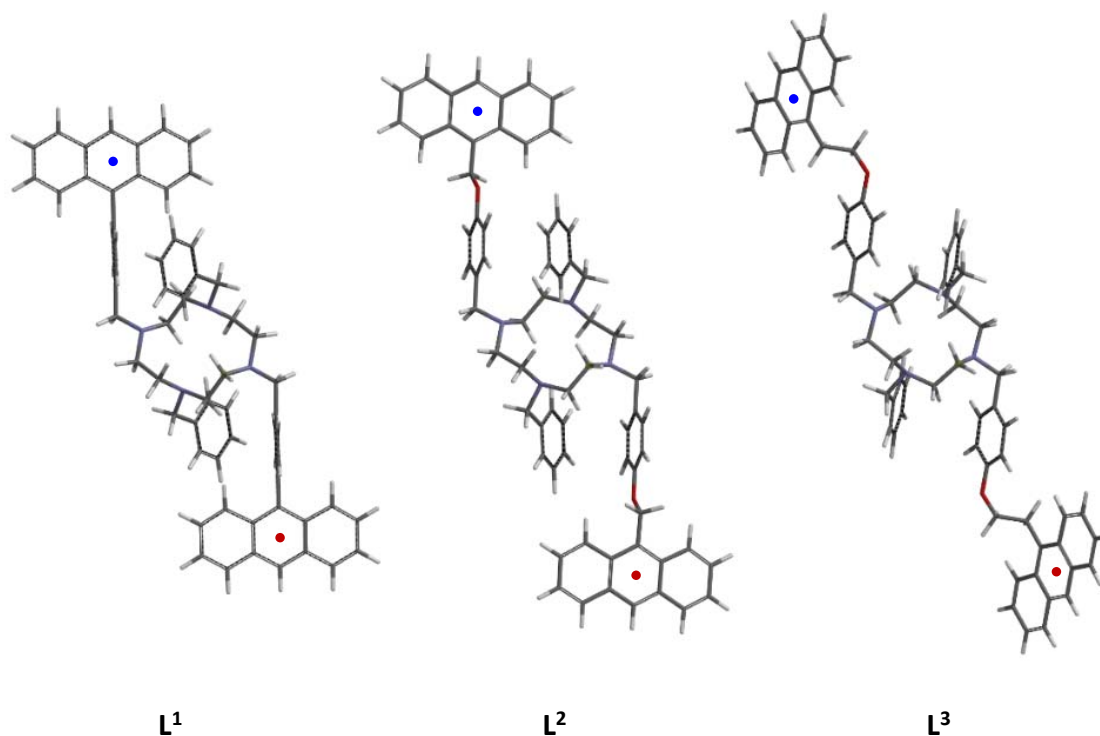

**Fig. S14.** Structures of  $L^1$ – $L^3$  optimized by DFT (B3LYP/6-311G). The positions of points 1 and 2 in each compounds are indicated by ● and ●, respectively.

**Table S1.** Fluorescence Intensities and the average distances between the center of chromophores and nitrogen atoms in  $L^1$ ,  $L^2$ , and  $L^3$

|               | $L^1$                                                            | $L^2$   | $L^3$    |
|---------------|------------------------------------------------------------------|---------|----------|
| Intensity (I) | 60000                                                            | 4000000 | 14000000 |
| Log I         | 4.778                                                            | 6.602   | 7.146    |
|               | Average distances between the center of chromophores and N atoms |         |          |
| N1-Point1     | 8.0 Å                                                            | 9.9 Å   | 10.2 Å   |
| N2-Point1     | 11.2 Å                                                           | 9.4 Å   | 10.5 Å   |
| N3-Point1     | 11.6 Å                                                           | 12.8 Å  | 13.7 Å   |
| N4-Point1     | 8.2 Å                                                            | 12.9 Å  | 13.2 Å   |
| N1-Point2     | 11.6 Å                                                           | 12.8 Å  | 13.6 Å   |
| N2-Point2     | 8.2 Å                                                            | 12.9 Å  | 13.2 Å   |
| N3-Point2     | 8.0 Å                                                            | 9.9 Å   | 10.1 Å   |
| N4-Point2     | 11.0 Å                                                           | 9.5 Å   | 10.5 Å   |
| Average       | 9.7 Å                                                            | 11.3 Å  | 11.9 Å   |

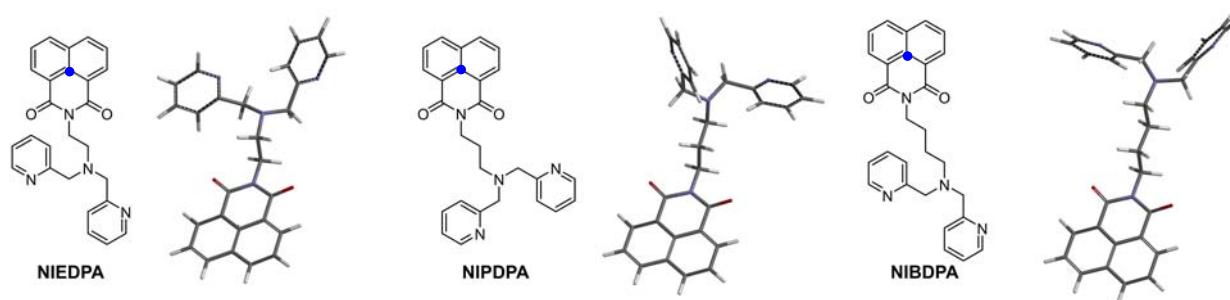

**Fig. S15.** Structures of **NIEDPA**, **NIPDPA**, and **NIBDPA**<sup>S1</sup> optimized by DFT (B3LYP/6-311G). The position of point 1 in each compound is indicated by ●

**Table S2.** Fluorescence Intensities at 394 nm and the average distances between the center of chromophores and nitrogen atoms in **NIEDPA**, **NIPDPA**, and **NIBDPA** optimized by DFT calculation (B3LYP/6-311G).<sup>S1</sup>

|                                                                  | <b>NIEDPA</b> | <b>NIPDPA</b> | <b>NIBDPA</b> |
|------------------------------------------------------------------|---------------|---------------|---------------|
| Intensity (I)                                                    | 38.78         | 145.0         | 176.8         |
| <b>Log I</b>                                                     | <b>1.589</b>  | <b>2.161</b>  | <b>2.247</b>  |
| Average distances between the center of chromophores and N atoms |               |               |               |
| N3-Point1                                                        | 8.4 Å         | 10.0 Å        | 10.3 Å        |
| N4-Point1                                                        | 8.1 Å         | 9.9 Å         | 11.9 Å        |
| <b>Average</b>                                                   | <b>8.3 Å</b>  | <b>10.0 Å</b> | <b>11.1 Å</b> |

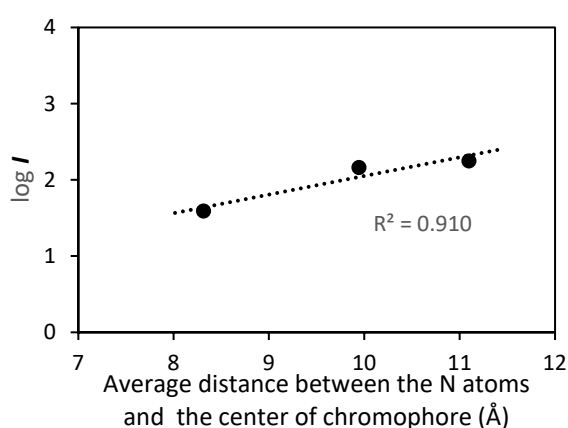

**Fig. S16.** Correlation between the average distances between donors (nitrogen atoms in the pyridine) and the center of naphthalimide of **NIEDPA**, **NIPDPA**, and **NIBDPA**<sup>S1</sup> optimized by DFT (B3LYP/6-311G) and fluorescence intensities at 394 nm.

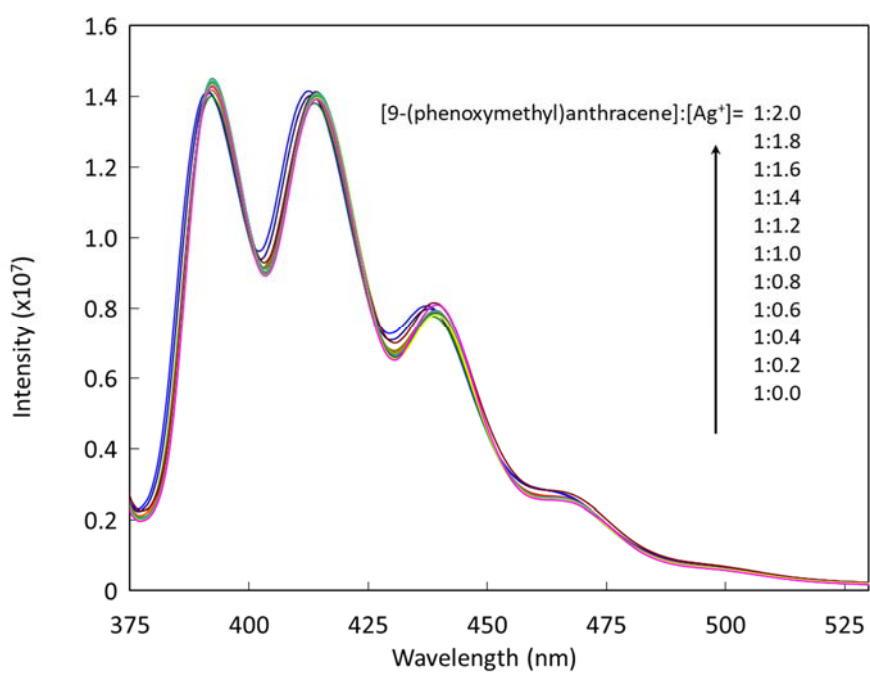

**Fig. S17.** Ag<sup>+</sup> ion-induced fluorescence spectral changes. [9-(phenoxy)methyl]anthracene<sup>S2</sup> = [metal ion]=4.0 × 10<sup>-7</sup> M in THF. λ<sub>ex</sub>=363 nm.

**Table S3** Cartesian coordinates of L<sup>1</sup>-L<sup>3</sup>, NIEDPA,<sup>S1</sup> NIPDPA,<sup>S1</sup> and NIBDPA<sup>S1</sup> optimized by DFT calculations (B3LYP/6-311G)

| Cartesian Coordinates (Angstroms) of L1 |     |            |            |            |    |      |            |            |             |
|-----------------------------------------|-----|------------|------------|------------|----|------|------------|------------|-------------|
| Atom                                    | X   | Y          | Z          |            |    |      |            |            |             |
| 1                                       | N1  | 1.8762509  | 0.4067796  | -1.8618576 | 34 | C16  | -3.3307294 | -2.235399  | -8.840725   |
| 2                                       | N2  | -1.357222  | -0.4485303 | -1.4740208 | 35 | H16  | -4.3026799 | -2.7015663 | -8.9672643  |
| 3                                       | C1  | 2.61139    | 0.9221219  | -0.6991339 | 36 | C17  | -2.643068  | -1.7704664 | -9.9250723  |
| 4                                       | H1A | 3.1979721  | 1.7746693  | -1.0528061 | 37 | H17  | -3.0610978 | -1.8622079 | -10.9233719 |
| 5                                       | H1B | 3.3465571  | 0.1854607  | -0.3278528 | 38 | C18  | -1.3611763 | -1.1556323 | -9.7794423  |
| 6                                       | C2  | 1.1362983  | -0.8364017 | -1.568907  | 39 | C19  | -0.6481332 | -0.6815973 | -10.8815201 |
| 7                                       | H2A | 0.9828744  | -0.8853164 | -0.4919367 | 40 | H19  | -1.0793498 | -0.7813086 | -11.874309  |
| 8                                       | H2B | 1.7527259  | -1.7120594 | -1.8334345 | 41 | C20  | 0.6055731  | -0.0845373 | -10.7400321 |
| 9                                       | C3  | -0.2245827 | -0.9394122 | -2.2798144 | 42 | C21  | 1.3355575  | 0.3976556  | -11.8695724 |
| 10                                      | H3A | -0.1886935 | -0.3565722 | -3.1964925 | 43 | H21  | 0.8913114  | 0.2900202  | -12.854996  |
| 11                                      | H3B | -0.4085476 | -1.9876232 | -2.5819094 | 44 | C22  | 2.5619823  | 0.9799532  | -11.720781  |
| 12                                      | C4  | -1.7285948 | -1.4389894 | -0.4503674 | 45 | H22  | 3.1056676  | 1.342      | -12.5875237 |
| 13                                      | H4A | -0.8167332 | -1.8369503 | -0.003187  | 46 | C23  | 3.1345082  | 1.114446   | -10.4253037 |
| 14                                      | H4B | -2.2359562 | -2.297098  | -0.9311899 | 47 | H23  | 4.1102388  | 1.5779219  | -10.3189643 |
| 15                                      | C5  | 2.807446   | 0.2439202  | -2.9878922 | 48 | C24  | 2.4692405  | 0.6675694  | -9.3175415  |
| 16                                      | H5A | 3.5068148  | -0.5913119 | -2.7982097 | 49 | H24  | 2.9178625  | 0.7769512  | -8.337695   |
| 17                                      | H5B | 3.418979   | 1.1507651  | -3.0368445 | 50 | C25  | 1.1817064  | 0.0504831  | -9.4231755  |
| 18                                      | C6  | 2.1653745  | 0.0445855  | -4.3460113 | 51 | C26  | -2.4995535 | -0.1397932 | -2.3415029  |
| 19                                      | C7  | 1.3326185  | 1.0274525  | -4.891806  | 52 | H26A | -3.382838  | -0.0170919 | -1.708192   |
| 20                                      | H7  | 1.0912285  | 1.9092057  | -4.3071948 | 53 | H26B | -2.7280546 | -0.9914309 | -3.0096635  |
| 21                                      | C8  | 0.7854196  | 0.8750408  | -6.1602624 | 54 | C27  | -2.3426769 | 1.1203067  | -3.1712441  |
| 22                                      | H8  | 0.1341333  | 1.6464105  | -6.5571908 | 55 | C28  | -1.7624674 | 2.2725837  | -2.6317903  |
| 23                                      | C9  | 1.0562496  | -0.2654437 | -6.928774  | 56 | H28  | -1.3557653 | 2.2349476  | -1.6281419  |
| 24                                      | C10 | 1.8864327  | -1.2478031 | -6.3836883 | 57 | C29  | -1.6920529 | 3.4479138  | -3.3746501  |
| 25                                      | H10 | 2.1077665  | -2.1406629 | -6.9603812 | 58 | H29  | -1.2382629 | 4.3333032  | -2.939678   |
| 26                                      | C11 | 2.4313189  | -1.0929261 | -5.1088889 | 59 | C30  | -2.2025491 | 3.4918125  | -4.6716963  |
| 27                                      | H11 | 3.0747152  | -1.8703849 | -4.7057952 | 60 | H30  | -2.1495327 | 4.4088269  | -5.2499381  |
| 28                                      | C12 | 0.4710903  | -0.4189773 | -8.2976124 | 61 | C31  | -2.7770872 | 2.3482742  | -5.2209784  |
| 29                                      | C13 | -0.7932983 | -1.0254885 | -8.4587102 | 62 | H31  | -3.1688432 | 2.3651185  | -6.2334827  |
| 30                                      | C14 | -1.5509483 | -1.5273734 | -7.3526969 | 63 | C32  | -2.8417874 | 1.1723042  | -4.4752528  |
| 31                                      | H14 | -1.1372385 | -1.4381425 | -6.3556031 | 64 | H32  | -3.283281  | 0.2840042  | -4.9182303  |
| 32                                      | C15 | -2.7732249 | -2.1128178 | -7.5373772 | 65 | N1   | -1.8744827 | -0.4136556 | 1.8617329   |
| 33                                      | H15 | -3.3258976 | -2.4922796 | -6.6835503 | 66 | N2   | 1.358564   | 0.442442   | 1.474128    |
|                                         |     |            |            |            | 67 | C1   | -2.6095369 | -0.9296858 | 0.6992423   |
|                                         |     |            |            |            | 68 | H1A  | -3.1949331 | -1.7828503 | 1.0532688   |

|     |     |            |            |            |      |      |            |            |            |
|-----|-----|------------|------------|------------|------|------|------------|------------|------------|
| 69  | H1B | -3.345577  | -0.1936719 | 0.3283109  | 108  | C22  | -2.5568376 | -0.9769924 | 11.7230836 |
| 70  | C2  | -1.1350913 | 0.8297463  | 1.5686455  | 109  | H22  | -3.099392  | -1.3385513 | 12.5907045 |
| 71  | H2A | -0.9816291 | 0.8786878  | 0.4914951  | 110  | C23  | -3.1289474 | -1.1162273 | 10.4278645 |
| 72  | H2B | -1.7516341 | 1.705391   | 1.833386   | 111  | H23  | -4.1030443 | -1.5831798 | 10.3224777 |
| 73  | C3  | 0.2259037  | 0.933571   | 2.2795209  | 112  | C24  | -2.4654348 | -0.6695587 | 9.3191133  |
| 74  | H3A | 0.1902188  | 0.3515147  | 3.1967656  | 113  | H24  | -2.9138392 | -0.7824485 | 8.3396099  |
| 75  | H3B | 0.4090477  | 1.981949   | 2.5809969  | 114  | C25  | -1.18012   | -0.047945  | 9.4234921  |
| 76  | C4  | 1.7302391  | 1.4321652  | 0.450085   | 115  | C26  | 2.500785   | 0.1336007  | 2.3416257  |
| 77  | H4A | 0.818552   | 1.8301214  | 0.0029276  | 116  | H26A | 3.3837642  | 0.0095875  | 1.7085423  |
| 78  | H4B | 2.2376199  | 2.2901947  | 0.9305256  | 117  | H26B | 2.7300665  | 0.9855028  | 3.0088591  |
| 79  | C5  | -2.8057809 | -0.2510249 | 2.9876179  | 118  | C27  | 2.3431174  | -1.1255914 | 3.1725333  |
| 80  | H5A | -3.5060873 | 0.5835715  | 2.7978258  | 119  | C28  | 1.762818   | -2.2781229 | 2.6339284  |
| 81  | H5B | -3.4164568 | -1.1585594 | 3.0369543  | 120  | H28  | 1.3567868  | -2.2410823 | 1.6300573  |
| 82  | C6  | -2.1643017 | -0.049529  | 4.3457124  | 121  | C29  | 1.6915406  | -3.4525951 | 3.3779807  |
| 83  | C7  | -1.3291678 | -1.0299059 | 4.8923982  | 122  | H29  | 1.2376177  | -4.3382304 | 2.9435103  |
| 84  | H7  | -1.0848915 | -1.9113169 | 4.3084528  | 123  | C30  | 2.2011482  | -3.4952606 | 4.6753921  |
| 85  | C8  | -0.7827119 | -0.8751099 | 6.1609045  | 124  | H30  | 2.147331   | -4.4116423 | 5.2546774  |
| 86  | H8  | -0.1296495 | -1.6445085 | 6.5586005  | 125  | C31  | 2.7756666  | -2.3513736 | 5.2238526  |
| 87  | C9  | -1.0565946 | 0.2652879  | 6.928395   | 126  | H31  | 3.1667738  | -2.3674733 | 6.2364863  |
| 88  | C10 | -1.8892955 | 1.2450427  | 6.3824695  | 127  | C32  | 2.8412969  | -1.1762828 | 4.4769599  |
| 89  | H10 | -2.1133904 | 2.1377749  | 6.9582919  | 128  | H32  | 3.2827084  | -0.2875249 | 4.9191093  |
| 90  | C11 | -2.4333803 | 1.0878291  | 5.1077163  |      |      |            |            |            |
| 91  | H11 | -3.0787685 | 1.863302   | 4.7039759  |      |      |            |            |            |
| 92  | C12 | -0.4715784 | 0.4223215  | 8.2968787  |      |      |            |            |            |
| 93  | C13 | 0.7905475  | 1.0340151  | 8.4566236  | Atom | X    | Y          | Z          |            |
| 94  | C14 | 1.5456711  | 1.5373213  | 7.3496114  | 1    | N1   | 1.8855622  | 1.1140727  | -1.5212386 |
| 95  | H14 | 1.1324801  | 1.4447407  | 6.3524751  | 2    | N2   | -0.854928  | -0.8257462 | -1.69886   |
| 96  | C15 | 2.7652603  | 2.128529   | 7.5331379  | 3    | C1   | 2.2094276  | 1.7695117  | -0.2479559 |
| 97  | H15 | 3.3157006  | 2.5091672  | 6.6783679  | 4    | H1A  | 2.5443191  | 2.7813478  | -0.4923972 |
| 98  | C16 | 3.3225221  | 2.2555573  | 8.8361812  | 5    | H1B  | 3.0645459  | 1.28203    | 0.2540811  |
| 99  | H16 | 4.2924108  | 2.7263184  | 8.961621   | 6    | C2   | 1.6054244  | -0.3264057 | -1.3683349 |
| 100 | C17 | 2.6374132  | 1.7890782  | 9.921443   | 7    | H2A  | 1.3311234  | -0.5038957 | -0.3292346 |
| 101 | H17 | 3.0554     | 1.8841527  | 10.9196935 | 8    | H2B  | 2.5265512  | -0.9071262 | -1.5447545 |
| 102 | C18 | 1.3582487  | 1.1686765  | 9.7770377  | 9    | C3   | 0.4965289  | -0.8639311 | -2.2896629 |
| 103 | C19 | 0.6474083  | 0.6938672  | 10.880225  | 10   | H3A  | 0.4820471  | -0.2789021 | -3.2057475 |
| 104 | H19 | 1.0779688  | 0.7974147  | 11.8728996 | 11   | H3B  | 0.7408385  | -1.9014188 | -2.5850376 |
| 105 | C20 | -0.6042093 | 0.0917477  | 10.740093  | 12   | C4   | -1.0203998 | -1.9141698 | -0.7206265 |
| 106 | C21 | -1.3324195 | -0.3904134 | 11.8707192 | 13   | H4A  | -0.1160758 | -1.9862102 | -0.1150978 |
| 107 | H21 | -0.8887948 | -0.2790877 | 12.855917  | 14   | H4B  | -1.1093921 | -2.8798355 | -1.2536365 |
|     |     |            |            |            | 15   | C5   | 2.958217   | 1.37219    | -2.4971589 |

Cartesian Coordinates (Angstroms) of L<sup>2</sup>



|    |      |            |            |            |    |     |            |            |            |
|----|------|------------|------------|------------|----|-----|------------|------------|------------|
| 16 | H5A  | 3.8795663  | 0.8251466  | -2.2224437 | 55 | H12 | 1.1166949  | 2.8729639  | 1.256876   |
| 17 | H5B  | 3.2018802  | 2.4374949  | -2.4324975 | 56 | C16 | -2.9556751 | -1.3753155 | 2.4968634  |
| 18 | C6   | 2.6033777  | 1.0491519  | -3.9320927 | 57 | H13 | -3.8762195 | -0.8276831 | 2.220626   |
| 19 | C7   | 1.6006342  | 1.7616786  | -4.589694  | 58 | H14 | -3.2003764 | -2.4404592 | 2.433303   |
| 20 | H7   | 1.0569393  | 2.5350469  | -4.0563384 | 59 | C17 | -2.6017943 | -1.0504999 | 3.9316533  |
| 21 | C8   | 1.2449744  | 1.4797844  | -5.90611   | 60 | C18 | -1.5993211 | -1.7619561 | 4.5908639  |
| 22 | H8   | 0.4484     | 2.0509751  | -6.3641985 | 61 | H15 | -1.0550206 | -2.5358431 | 4.0588851  |
| 23 | C9   | 1.9012807  | 0.4563536  | -6.5979151 | 62 | C19 | -1.2450987 | -1.4786985 | 5.9073895  |
| 24 | C10  | 2.9239593  | -0.2529298 | -5.9604655 | 63 | H16 | -0.4489955 | -2.0493971 | 6.3669123  |
| 25 | H10  | 3.4288212  | -1.0403959 | -6.50941   | 64 | C20 | -1.9024345 | -0.4548296 | 6.5975875  |
| 26 | C11  | 3.2642001  | 0.0447171  | -4.6468028 | 65 | C21 | -2.9246437 | 0.2535443  | 5.9584216  |
| 27 | H11  | 4.0554829  | -0.5235746 | -4.1654607 | 66 | H17 | -3.4303529 | 1.0413388  | 6.5061115  |
| 28 | C26  | -1.8688855 | -0.9386041 | -2.7524218 | 67 | C22 | -3.263527  | -0.0455172 | 4.6447155  |
| 29 | H26A | -2.8202073 | -1.2020151 | -2.2805434 | 68 | H18 | -4.0546051 | 0.5219824  | 4.1620982  |
| 30 | H26B | -1.6341976 | -1.7812421 | -3.4301803 | 69 | C23 | 1.8751459  | 0.9297043  | 2.7525584  |
| 31 | C27  | -2.1035632 | 0.3142983  | -3.5751765 | 70 | H19 | 2.826794   | 1.1910217  | 2.280167   |
| 32 | C28  | -1.9352514 | 1.5925974  | -3.0382604 | 71 | H20 | 1.642325   | 1.7729482  | 3.4302091  |
| 33 | H28  | -1.5487739 | 1.6906989  | -2.0314841 | 72 | C24 | 2.1075193  | -0.3235034 | 3.5754223  |
| 34 | C29  | -2.2513562 | 2.7258492  | -3.7857481 | 73 | C25 | 1.9387372  | -1.6015047 | 3.0378306  |
| 35 | H29  | -2.1147249 | 3.7112835  | -3.3502929 | 74 | H21 | 1.5535268  | -1.6989589 | 2.0304947  |
| 36 | C30  | -2.7464242 | 2.6000169  | -5.08248   | 75 | C33 | 2.2526915  | -2.735284  | 3.7853576  |
| 37 | H30  | -2.9997393 | 3.4829536  | -5.66115   | 76 | H22 | 2.1157104  | -3.7204477 | 3.3494015  |
| 38 | C31  | -2.913902  | 1.3288438  | -5.6296412 | 77 | C34 | 2.7459488  | -2.6103436 | 5.0828994  |
| 39 | H31  | -3.298349  | 1.2151814  | -6.6388147 | 78 | H23 | 2.9974815  | -3.493737  | 5.6616461  |
| 40 | C32  | -2.5876023 | 0.199181   | -4.8824038 | 79 | C35 | 2.9137937  | -1.3395361 | 5.6307337  |
| 41 | H32  | -2.7198315 | -0.7871562 | -5.3197958 | 80 | H24 | 3.2967753  | -1.2265468 | 6.6405418  |
| 42 | N3   | -1.8818629 | -1.1192588 | 1.521784   | 81 | C36 | 2.5897261  | -0.2092825 | 4.8833565  |
| 43 | N4   | 0.8605878  | 0.8185953  | 1.6993748  | 82 | H25 | 2.7222324  | 0.7767701  | 5.3213046  |
| 44 | C12  | -2.2049144 | -1.7747759 | 0.2483259  | 83 | O1  | 1.6116008  | 0.0734148  | -7.8778219 |
| 45 | H1   | -2.5410939 | -2.786232  | 0.4925271  | 84 | O2  | -1.6145694 | -0.0709968 | 7.8776616  |
| 46 | H2   | -3.0588426 | -1.286466  | -0.2548912 | 85 | C37 | 0.5067299  | 0.7051474  | -8.5389046 |
| 47 | C13  | -1.5996849 | 0.3207572  | 1.3685194  | 86 | H26 | -0.3834317 | 0.6407752  | -7.9076096 |
| 48 | H3   | -1.3242445 | 0.4975009  | 0.329575   | 87 | H27 | 0.7178579  | 1.7684589  | -8.6773873 |
| 49 | H4   | -2.5201891 | 0.9027149  | 1.5439795  | 88 | C38 | -0.5083131 | -0.6995812 | 8.5394503  |
| 50 | C14  | -0.4907012 | 0.8568229  | 2.2906089  | 89 | H33 | 0.3816921  | -0.6340942 | 7.9080854  |
| 51 | H5   | -0.4765202 | 0.2705991  | 3.2059536  | 90 | H34 | -0.7171482 | -1.7631986 | 8.6792599  |
| 52 | H6   | -0.7344706 | 1.8940577  | 2.5872543  | 91 | H35 | -2.2548574 | -3.3208902 | -7.8936066 |
| 53 | C15  | 1.0261181  | 1.9082147  | 0.7224595  | 92 | C39 | -1.8867554 | -2.8574693 | -8.8035603 |
| 54 | H9   | 0.1212001  | 1.9821284  | 0.1180125  | 93 | H36 | -0.7979248 | -1.3800558 | -7.7497206 |



|    |     |            |            |            |     |     |             |            |             |
|----|-----|------------|------------|------------|-----|-----|-------------|------------|-------------|
| 42 | N3  | 0.6796949  | 1.7501565  | -1.9250315 | 92  | H35 | -6.3262881  | -1.3609935 | 8.0381829   |
| 43 | N4  | 1.1136298  | -1.4346346 | -0.9504782 | 93  | H36 | -6.2422183  | -1.8771073 | 6.3871111   |
| 44 | C12 | 0.0327587  | 2.6736955  | -0.9846555 | 94  | C40 | 6.6104619   | 1.0680309  | -7.0192281  |
| 45 | H1  | 0.5877203  | 3.6142662  | -1.0362637 | 95  | H37 | 6.2456345   | 1.8754922  | -6.3851715  |
| 46 | H2  | -0.9976835 | 2.9148791  | -1.3021603 | 96  | H38 | 6.3367731   | 1.3583101  | -8.0356148  |
| 47 | C13 | -0.0700067 | 0.4903827  | -2.09267   | 97  | H39 | -8.4638961  | 0.9274058  | 11.1345562  |
| 48 | H3  | -0.7309944 | 0.3794601  | -1.2339838 | 98  | C41 | -8.9608494  | 0.6175746  | 10.2207262  |
| 49 | H4  | -0.724716  | 0.5611264  | -2.9773994 | 99  | H40 | -7.1590867  | -0.0344204 | 9.3326234   |
| 50 | C14 | 0.8113783  | -0.7626582 | -2.2278402 | 100 | C42 | -8.2282719  | 0.0741605  | 9.2015232   |
| 51 | H5  | 1.7541502  | -0.4827589 | -2.6908439 | 101 | C43 | -10.9981961 | 0.3910658  | 8.9529639   |
| 52 | H6  | 0.3246688  | -1.4783972 | -2.9164749 | 102 | C44 | -8.8408141  | -0.351313  | 7.9775931   |
| 53 | C15 | -0.0533535 | -2.2047388 | -0.489343  | 103 | C45 | -10.3674997 | 0.7809643  | 10.0990388  |
| 54 | H9  | -0.9472157 | -1.5937525 | -0.6187091 | 104 | C46 | -10.2701242 | -0.1794406 | 7.8641493   |
| 55 | H12 | -0.1914411 | -3.0934134 | -1.1345466 | 105 | C47 | -8.1101539  | -0.9186968 | 6.9060284   |
| 56 | C16 | 0.9084772  | 2.4357559  | -3.2070237 | 106 | H41 | -10.9326016 | 1.213428   | 10.9183578  |
| 57 | H13 | -0.0491772 | 2.6198098  | -3.7300707 | 107 | H42 | -11.9928129 | -0.440589  | 6.6112158   |
| 58 | H14 | 1.3227999  | 3.4223545  | -2.9747066 | 108 | H43 | -12.0728604 | 0.508616   | 8.8472894   |
| 59 | C17 | 1.8563149  | 1.7367418  | -4.1591139 | 109 | C48 | -8.7858835  | -1.3067705 | 5.724257    |
| 60 | C18 | 3.1808763  | 1.4890742  | -3.7954562 | 110 | C49 | -8.1223547  | -1.88195   | 4.5917168   |
| 61 | H15 | 3.5178741  | 1.743545   | -2.7960635 | 111 | C50 | -10.2169047 | -1.1293785 | 5.623823    |
| 62 | C19 | 4.08001    | 0.8873907  | -4.6717402 | 112 | H44 | -11.9691681 | -1.385733  | 4.377571    |
| 63 | H16 | 5.0868225  | 0.6928973  | -4.3266325 | 113 | C51 | -10.9171138 | -0.5725073 | 6.6930517   |
| 64 | C20 | 3.6636475  | 0.5203055  | -5.9556549 | 114 | C52 | -8.8072075  | -2.2519356 | 3.4668089   |
| 65 | C21 | 2.3403354  | 0.7624911  | -6.334396  | 115 | H45 | -7.0516861  | -2.0358014 | 4.6157234   |
| 66 | H17 | 2.0247898  | 0.4705102  | -7.3302115 | 116 | H46 | -8.2702012  | -2.6908318 | 2.6318597   |
| 67 | C22 | 1.4552983  | 1.3593821  | -5.4437714 | 117 | C53 | -10.2146159 | -2.0732759 | 3.3790876   |
| 68 | H18 | 0.4303908  | 1.5366267  | -5.7584123 | 118 | H47 | -10.7415811 | -2.3732466 | 2.4791192   |
| 69 | C23 | 2.2762209  | -2.3150524 | -1.1098753 | 119 | C54 | -10.8935169 | -1.5274983 | 4.4297833   |
| 70 | H19 | 2.318639   | -2.9807407 | -0.2429784 | 120 | H48 | 8.4799      | -0.9486145 | -11.1154074 |
| 71 | H20 | 2.1496486  | -2.9764708 | -1.9873193 | 121 | C55 | 8.9735815   | -0.638268  | -10.1999798 |
| 72 | C24 | 3.612125   | -1.6036123 | -1.2110886 | 122 | H49 | 7.1700782   | 0.0233136  | -9.3225696  |
| 73 | C25 | 3.8815165  | -0.4466196 | -0.4740585 | 123 | C56 | 8.2381901   | -0.0891119 | -9.185904   |
| 74 | H21 | 3.0910244  | -0.0096393 | 0.1240582  | 124 | C57 | 11.0055637  | -0.4166801 | -8.9227448  |
| 75 | C33 | 5.1412874  | 0.1464922  | -0.5178404 | 125 | C58 | 8.8464371   | 0.3371099  | -7.9600773  |
| 76 | H22 | 5.3324065  | 1.0454369  | 0.0611582  | 126 | C59 | 10.3789402  | -0.8070931 | -10.0708751 |
| 77 | C34 | 6.1547986  | -0.4075721 | -1.2993156 | 127 | C60 | 10.2744219  | 0.159696   | -7.839066   |
| 78 | H23 | 7.1362293  | 0.0544554  | -1.336164  | 128 | C61 | 8.1126176   | 0.909775   | -6.8935603  |
| 79 | C35 | 5.8954459  | -1.5586669 | -2.0403068 | 129 | H50 | 10.9462769  | -1.2441912 | -10.8861708 |
| 80 | H24 | 6.6761749  | -1.9985263 | -2.6533656 | 130 | H51 | 11.9918888  | 0.4172551  | -6.5781914  |
| 81 | C36 | 4.6324829  | -2.1455638 | -1.998169  | 131 | H52 | 12.0791839  | -0.5384186 | -8.8113584  |
| 82 | H25 | 4.436285   | -3.0379677 | -2.5867359 | 132 | C62 | 8.7839254   | 1.2977257  | -5.7091568  |
| 83 | O1  | -4.4506818 | 0.0990651  | 6.8881094  | 133 | C63 | 8.1170228   | 1.877762   | -4.5810903  |
| 84 | O2  | 4.4487906  | -0.09435   | -6.8922104 | 134 | C64 | 10.2137496  | 1.1152045  | -5.6012865  |
| 85 | C37 | -5.857082  | 0.2262679  | 6.6774825  | 135 | H53 | 11.960868   | 1.3679601  | -4.3470914  |
| 86 | H26 | -6.1625846 | 1.0302121  | 7.3480965  | 136 | C65 | 10.9171303  | 0.5531315  | -6.6657349  |
| 87 | H27 | -6.0752716 | 0.5546484  | 5.6573474  | 137 | C66 | 8.7977989   | 2.2479986  | -3.4537543  |
| 88 | C38 | 5.85387    | -0.2264628 | -6.6766663 | 138 | H54 | 7.0470496   | 2.0353656  | -4.610567   |
| 89 | H33 | 6.158074   | -1.0315439 | -7.3463985 | 139 | H55 | 8.2583259   | 2.6909674  | -2.6225617  |
| 90 | H34 | 6.0670107  | -0.5560719 | -5.6558202 | 140 | C67 | 10.2041004  | 2.0645047  | -3.3588107  |
| 91 | C39 | -6.606717  | -1.0713038 | 7.0234832  | 141 | H56 | 10.7278184  | 2.3647572  | -2.4570469  |

142 C68 10.8860293 1.5136608 -4.4049106

**Cartesian Coordinates (Angstroms) of NIEDPA**

| Atom   | X          | Y          | Z          |
|--------|------------|------------|------------|
| 1 H1   | -3.0450617 | -2.1195054 | -5.6674005 |
| 2 C1   | -2.1725515 | -1.632661  | -5.2416639 |
| 3 H6   | -0.9030135 | -2.1096316 | -6.9034755 |
| 4 C6   | -0.9772945 | -1.627338  | -5.9319165 |
| 5 C3   | -1.1706612 | -0.3819837 | -3.4227135 |
| 6 C5   | 0.1735592  | -0.9968343 | -5.3901877 |
| 7 C2   | -2.271604  | -1.007227  | -3.9813967 |
| 8 C4   | 0.0672269  | -0.3662188 | -4.1131928 |
| 9 C10  | 1.4254613  | -0.9642083 | -6.0590884 |
| 10 H2  | -3.2058016 | -1.0037993 | -3.4294916 |
| 11 C9  | 2.5164194  | -0.3399999 | -5.4886876 |
| 12 H10 | 1.51309    | -1.4413657 | -7.0321701 |
| 13 H9  | 3.4683662  | -0.3228298 | -6.0110887 |
| 14 C8  | 2.4061304  | 0.2784031  | -4.2257657 |
| 15 H8  | 3.2574058  | 0.769695   | -3.7658716 |
| 16 C7  | 1.2005493  | 0.2682819  | -3.5463171 |
| 17 C11 | 1.1056428  | 0.9247159  | -2.2196833 |
| 18 C12 | -1.2967667 | 0.2721098  | -2.0970674 |
| 19 N1  | -0.1529449 | 0.9051365  | -1.5908677 |
| 20 O1  | 2.0609188  | 1.4695623  | -1.6840971 |
| 21 O2  | -2.3519702 | 0.2860334  | -1.4719039 |
| 22 C13 | -0.2614106 | 1.5546697  | -0.2739423 |
| 23 H4  | -1.2884961 | 1.906911   | -0.1810642 |
| 24 H5  | 0.4206958  | 2.4043938  | -0.2785075 |
| 25 C14 | 0.0889068  | 0.572538   | 0.8708829  |
| 26 H3  | 1.1552456  | 0.3288014  | 0.8101693  |
| 27 H7  | -0.4668689 | -0.3586283 | 0.7113278  |
| 28 N2  | -0.2025196 | 1.0629925  | 2.2065534  |
| 29 C15 | -1.6146754 | 1.1529154  | 2.561183   |
| 30 H12 | -2.2117513 | 1.7443626  | 1.8437312  |
| 31 H13 | -1.6810251 | 1.657131   | 3.5299223  |
| 32 C16 | 0.708532   | 2.0753911  | 2.721937   |
| 33 H11 | 1.0422402  | 2.7961066  | 1.9599971  |
| 34 H16 | 0.1784704  | 2.6665971  | 3.4793263  |
| 35 C17 | -2.2452233 | -0.2219457 | 2.7135271  |
| 36 C18 | -3.3203231 | -2.7183743 | 3.084162   |
| 37 N4  | -1.8953955 | -0.9158329 | 3.8118835  |
| 38 C20 | -3.1275581 | -0.7291635 | 1.7544792  |
| 39 C21 | -3.6722629 | -1.9996817 | 1.9442697  |
| 40 C22 | -2.4262848 | -2.1300126 | 3.9819692  |

|        |            |            |           |
|--------|------------|------------|-----------|
| 41 H17 | -3.359538  | -0.1495597 | 0.8659871 |
| 42 H18 | -4.3566027 | -2.4181306 | 1.2108179 |
| 43 H19 | -2.1254579 | -2.6607025 | 4.8846725 |
| 44 H20 | -3.7211411 | -3.7089296 | 3.2780855 |
| 45 C23 | 1.9564979  | 1.4847422  | 3.3682023 |
| 46 C24 | 4.2363504  | 0.5608714  | 4.5716002 |
| 47 C25 | 1.9304457  | 0.2282147  | 3.9855783 |
| 48 N3  | 3.050937   | 2.2606173  | 3.3402828 |
| 49 C27 | 4.1582448  | 1.7981908  | 3.9335165 |
| 50 C28 | 3.0924492  | -0.2375164 | 4.5965    |
| 51 H15 | 1.0100747  | -0.3469092 | 3.9780956 |
| 52 H22 | 5.0291439  | 2.4513168  | 3.8905617 |
| 53 H23 | 3.1058985  | -1.2079566 | 5.0866754 |
| 54 H24 | 5.1652901  | 0.2362447  | 5.0316648 |

**Cartesian Coordinates (Angstroms) of NIPDPA**

| Atom   | X          | Y          | Z          |
|--------|------------|------------|------------|
| 1 H1   | 4.2213493  | 5.2744804  | 3.7933728  |
| 2 C1   | 3.6488517  | 5.0324688  | 2.9028126  |
| 3 H6   | 3.0604384  | 7.0634452  | 2.5412417  |
| 4 C6   | 3.0010909  | 6.031203   | 2.2047246  |
| 5 C3   | 2.8502963  | 3.3651107  | 1.3348405  |
| 6 C5   | 2.2482469  | 5.7327435  | 1.0388787  |
| 7 C2   | 3.5732257  | 3.6925871  | 2.4683306  |
| 8 C4   | 2.1775623  | 4.3748605  | 0.6021161  |
| 9 C10  | 1.5625781  | 6.7224042  | 0.2870459  |
| 10 H2  | 4.0762488  | 2.8982303  | 3.0099031  |
| 11 C9  | 0.8425481  | 6.3813573  | -0.8399475 |
| 12 H10 | 1.6133525  | 7.7581812  | 0.6140029  |
| 13 H9  | 0.322261   | 7.1483928  | -1.4058422 |
| 14 C8  | 0.7752181  | 5.0382545  | -1.2655853 |
| 15 H8  | 0.2120105  | 4.7572803  | -2.1494548 |
| 16 C7  | 1.4320254  | 4.0473414  | -0.5580254 |
| 17 C11 | 1.3442001  | 2.6399517  | -1.0204392 |
| 18 C12 | 2.7801509  | 1.9488735  | 0.8969817  |
| 19 N1  | 2.0516423  | 1.6836902  | -0.2742551 |
| 20 O1  | 0.6931601  | 2.3092173  | -2.0029585 |
| 21 O2  | 3.3249979  | 1.0421686  | 1.5132492  |
| 22 C13 | 1.9718912  | 0.2816808  | -0.7215084 |
| 23 H4  | 2.9013869  | -0.1999243 | -0.4153201 |
| 24 H5  | 1.9101185  | 0.2985302  | -1.8109041 |
| 25 C14 | 0.7627023  | -0.4484923 | -0.1252401 |
| 26 H3  | -0.1575114 | 0.0651413  | -0.4241214 |
| 27 H7  | 0.8329651  | -0.3991139 | 0.9675757  |
| 28 C15 | 0.69513    | -1.9014713 | -0.6058636 |
| 29 H12 | 1.6266468  | -2.4379684 | -0.3410154 |
| 30 H13 | 0.6377434  | -1.9011129 | -1.6999057 |
| 31 N2  | -0.4894267 | -2.616169  | -0.1066123 |

|    |     |            |            |            |    |     |            |            |            |
|----|-----|------------|------------|------------|----|-----|------------|------------|------------|
| 32 | C16 | -0.3358872 | -3.040227  | 1.290085   | 17 | C11 | -0.3245458 | 1.6315526  | -3.7897345 |
| 33 | H14 | 0.1465699  | -2.2241475 | 1.840478   | 18 | C12 | -1.8268467 | -0.3043148 | -3.3322413 |
| 34 | H15 | 0.3170947  | -3.9228016 | 1.3967853  | 19 | N1  | -1.082104  | 0.8170084  | -2.9328099 |
| 35 | C17 | -0.8283897 | -3.7590754 | -0.9611364 | 20 | O1  | 0.336596   | 2.5614254  | -3.3458041 |
| 36 | H16 | 0.0368308  | -4.4166911 | -1.1534321 | 21 | O2  | -2.4266922 | -0.9818298 | -2.5075321 |
| 37 | H17 | -1.5643512 | -4.3698725 | -0.422512  | 22 | C13 | -1.0468496 | 1.1264499  | -1.491589  |
| 38 | C18 | -1.659347  | -3.3526388 | 1.9650688  | 23 | H4  | -2.0165791 | 0.8376295  | -1.0837128 |
| 39 | C19 | -3.9868189 | -3.9539415 | 3.2880219  | 24 | H5  | -0.9175016 | 2.2059048  | -1.4033362 |
| 40 | N4  | -1.7015093 | -4.4659585 | 2.7128287  | 25 | C14 | 0.0804397  | 0.3860675  | -0.7637206 |
| 41 | C20 | -2.7584872 | -2.4925282 | 1.8348425  | 26 | H3  | 1.0423323  | 0.6825535  | -1.2006453 |
| 42 | C21 | -3.9382355 | -2.7990558 | 2.5059076  | 27 | H7  | -0.0396353 | -0.6913453 | -0.9323205 |
| 43 | C22 | -2.8425948 | -4.7469923 | 3.3562649  | 28 | C15 | 0.0784073  | 0.6769991  | 0.7426593  |
| 44 | H18 | -2.6740857 | -1.6079155 | 1.2120637  | 29 | H12 | -0.8928553 | 0.4031729  | 1.1751838  |
| 45 | H19 | -4.8053716 | -2.1487985 | 2.4219002  | 30 | H13 | 0.2001969  | 1.7570746  | 0.9030908  |
| 46 | H20 | -2.8389442 | -5.6589924 | 3.9515973  | 31 | C16 | 1.1727002  | -0.1054221 | 1.4764906  |
| 47 | H21 | -4.8858312 | -4.2351465 | 3.8285819  | 32 | H11 | 2.1622934  | 0.1170422  | 1.0338731  |
| 48 | C23 | -1.4287307 | -3.3688568 | -2.2999615 | 33 | H14 | 0.9943522  | -1.1734905 | 1.3134373  |
| 49 | C24 | -2.5403532 | -2.8277708 | -4.7498986 | 34 | N2  | 1.1820171  | 0.124449   | 2.9300113  |
| 50 | C25 | -2.2386932 | -2.2352757 | -2.4436237 | 35 | C17 | 1.8393226  | 1.3884672  | 3.2801572  |
| 51 | N3  | -1.1718124 | -4.2042012 | -3.3194876 | 36 | H16 | 1.5183481  | 2.1476309  | 2.5564008  |
| 52 | C27 | -1.7243586 | -3.9326488 | -4.5079934 | 37 | H17 | 2.9386469  | 1.3282646  | 3.2041598  |
| 53 | C28 | -2.7984205 | -1.9603494 | -3.688649  | 38 | C18 | 1.8059123  | -0.9945246 | 3.6462946  |
| 54 | H22 | -2.4075805 | -1.5893441 | -1.588904  | 39 | H18 | 2.8028616  | -1.2506141 | 3.2486485  |
| 55 | H23 | -1.4945608 | -4.6335081 | -5.3096497 | 40 | H19 | 1.958975   | -0.6764092 | 4.6855975  |
| 56 | H24 | -3.425092  | -1.0830552 | -3.8283297 | 41 | C19 | 1.4962098  | 1.8887222  | 4.6723453  |
| 57 | H25 | -2.9537583 | -2.6535492 | -5.7389255 | 42 | C20 | 0.9662883  | 2.9123564  | 7.1618249  |
|    |     |            |            |            | 43 | N4  | 2.5071368  | 2.4273339  | 5.3720319  |
|    |     |            |            |            | 44 | C21 | 0.1866251  | 1.8290971  | 5.1672541  |
|    |     |            |            |            | 45 | C22 | -0.0799687 | 2.347881   | 6.4311589  |
|    |     |            |            |            | 46 | C23 | 2.2351243  | 2.9264967  | 6.5845177  |
|    |     |            |            |            | 47 | H20 | -0.5912956 | 1.3776064  | 4.5607632  |
|    |     |            |            |            | 48 | H21 | -1.0868943 | 2.3137748  | 6.8400226  |
|    |     |            |            |            | 49 | H22 | 3.0804531  | 3.3544718  | 7.1218918  |
|    |     |            |            |            | 50 | H23 | 0.8063997  | 3.3278426  | 8.1525052  |
|    |     |            |            |            | 51 | C24 | 0.9659452  | -2.2587024 | 3.6555075  |
|    |     |            |            |            | 52 | C25 | -0.4420306 | -4.6118016 | 3.7654727  |
|    |     |            |            |            | 53 | C26 | -0.4298282 | -2.2119725 | 3.766337   |
|    |     |            |            |            | 54 | N3  | 1.6447703  | -3.4155307 | 3.5950929  |
|    |     |            |            |            | 55 | C27 | 0.9466728  | -4.5564409 | 3.6539825  |
|    |     |            |            |            | 56 | C28 | -1.1425345 | -3.4066179 | 3.8200078  |
|    |     |            |            |            | 57 | H24 | -0.9284369 | -1.2496407 | 3.7995508  |
|    |     |            |            |            | 58 | H25 | 1.532018   | -5.4737648 | 3.6022969  |
|    |     |            |            |            | 59 | H26 | -2.2264948 | -3.3980579 | 3.9031204  |
|    |     |            |            |            | 60 | H27 | -0.9551417 | -5.5681984 | 3.8027035  |

#### Cartesian Coordinates (Angstroms) of NIBDPA

| Atom |     | X          | Y          | Z          |
|------|-----|------------|------------|------------|
| 1    | H1  | -3.1831302 | -2.8614529 | -6.9575275 |
| 2    | C1  | -2.6036656 | -2.0094879 | -6.6144965 |
| 3    | H6  | -1.9168676 | -1.4878761 | -8.579091  |
| 4    | C6  | -1.8975291 | -1.2434645 | -7.5197156 |
| 5    | C3  | -1.8460736 | -0.6134156 | -4.7834604 |
| 6    | C5  | -1.1347379 | -0.1265857 | -7.0883044 |
| 7    | C2  | -2.5777606 | -1.6955632 | -5.2395812 |
| 8    | C4  | -1.1145032 | 0.1879416  | -5.6954343 |
| 9    | C10 | -0.3898349 | 0.6911626  | -7.9782077 |
| 10   | H2  | -3.1266541 | -2.2916655 | -4.517891  |
| 11   | C9  | 0.3383932  | 1.7656026  | -7.5090498 |
| 12   | H10 | -0.4014276 | 0.4568086  | -9.0399396 |
| 13   | H9  | 0.9044341  | 2.3830813  | -8.20042   |
| 14   | C8  | 0.3563843  | 2.0699471  | -6.13174   |
| 15   | H8  | 0.9278125  | 2.9100577  | -5.7506003 |
| 16   | C7  | -0.3597274 | 1.296313   | -5.2354868 |

**Table S4.** Crystallographic Data and Structure Refinement.

|                                                                                      | [L <sup>2</sup> ·Ag]OTf                                                          | [L <sup>3</sup> ·Ag]OTf·DCE                                                                      |
|--------------------------------------------------------------------------------------|----------------------------------------------------------------------------------|--------------------------------------------------------------------------------------------------|
| formula                                                                              | C <sub>67</sub> H <sub>64</sub> AgF <sub>3</sub> N <sub>4</sub> O <sub>5</sub> S | C <sub>71</sub> H <sub>72</sub> AgCl <sub>2</sub> F <sub>3</sub> N <sub>4</sub> O <sub>5</sub> S |
| formula weight                                                                       | 1202.15                                                                          | 1329.15                                                                                          |
| Temperature (K)                                                                      | 90                                                                               | 90                                                                                               |
| crystal system                                                                       | Triclinic                                                                        | Orthorhombic                                                                                     |
| space group                                                                          | <i>P</i> -1                                                                      | <i>Pna</i> 2 <sub>1</sub>                                                                        |
| <i>Z</i>                                                                             | 2                                                                                | 4                                                                                                |
| <i>a</i> (Å)                                                                         | 14.5272(13)                                                                      | 19.4648(13)                                                                                      |
| <i>b</i> (Å)                                                                         | 14.5290(14)                                                                      | 21.0751(14)                                                                                      |
| <i>c</i> (Å)                                                                         | 15.8434(15)                                                                      | 14.7014(10)                                                                                      |
| $\alpha$ (°)                                                                         | 94.4274(19)                                                                      | 90                                                                                               |
| $\beta$ (°)                                                                          | 99.9833(18)                                                                      | 90                                                                                               |
| $\gamma$ (°)                                                                         | 116.5991(15)                                                                     | 90                                                                                               |
| <i>V</i> (Å <sup>3</sup> )                                                           | 2898.9(5)                                                                        | 6030.8(7)                                                                                        |
| <i>D</i> <sub>calc</sub> (g/cm <sup>3</sup> )                                        | 1.377                                                                            | 1.464                                                                                            |
| $\mu$ (mm <sup>-1</sup> )                                                            | 0.448                                                                            | 0.524                                                                                            |
| 2 $\theta$ <sub>max</sub> (°)                                                        | 52                                                                               | 52                                                                                               |
| reflections collected                                                                | 18392                                                                            | 37170                                                                                            |
| independent reflections                                                              | 11337 [ <i>R</i> <sub>int</sub> = 0.0324]                                        | 11194 [ <i>R</i> <sub>int</sub> = 0.0278]                                                        |
| goodness-of-fit on <i>F</i> <sup>2</sup>                                             | 1.038                                                                            | 1.010                                                                                            |
| <i>R</i> <sub>1</sub> , <i>wR</i> <sub>2</sub> [ <i>I</i> > 2 $\sigma$ ( <i>I</i> )] | 0.0493, 0.1134                                                                   | 0.0281, 0.0713                                                                                   |
| <i>R</i> <sub>1</sub> , <i>wR</i> <sub>2</sub> [all data]                            | 0.0603, 0.1202                                                                   | 0.0296, 0.0724                                                                                   |

**Table S5.** Selected Bond Lengths (Å) and Bond Angles (deg) for [L<sup>2</sup>·Ag]OTf.

|        |          |        |          |
|--------|----------|--------|----------|
| Ag1-N1 | 2.470(3) | Ag1-N2 | 2.429(3) |
|--------|----------|--------|----------|

|           |           |           |           |
|-----------|-----------|-----------|-----------|
| Ag1-N3    | 2.480(3)  | Ag1-N4    | 2.428(2)  |
| N1-Ag1-N2 | 76.20(9)  | N1-Ag1-N3 | 122.54(8) |
| N1-Ag1-N4 | 76.58(9)  | N2-Ag1-N3 | 76.58(9)  |
| N2-Ag1-N4 | 123.02(8) | N3-Ag1-N4 | 77.63(8)  |

**Table S6.** Selected Bond Lengths (Å) and Bond Angles (deg) for [L<sup>3</sup>·Ag]OTf·DCE.

|           |           |           |           |
|-----------|-----------|-----------|-----------|
| Ag1-N1    | 2.473(3)  | Ag1-N2    | 2.495(2)  |
| Ag1-N3    | 2.397(3)  | Ag1-N4    | 2.478(3)  |
| N1-Ag1-N2 | 75.40(9)  | N1-Ag1-N3 | 122.12(9) |
| N1-Ag1-N4 | 76.19(10) | N2-Ag1-N3 | 77.40(9)  |
| N2-Ag1-N4 | 122.75(9) | N3-Ag1-N4 | 77.43(9)  |

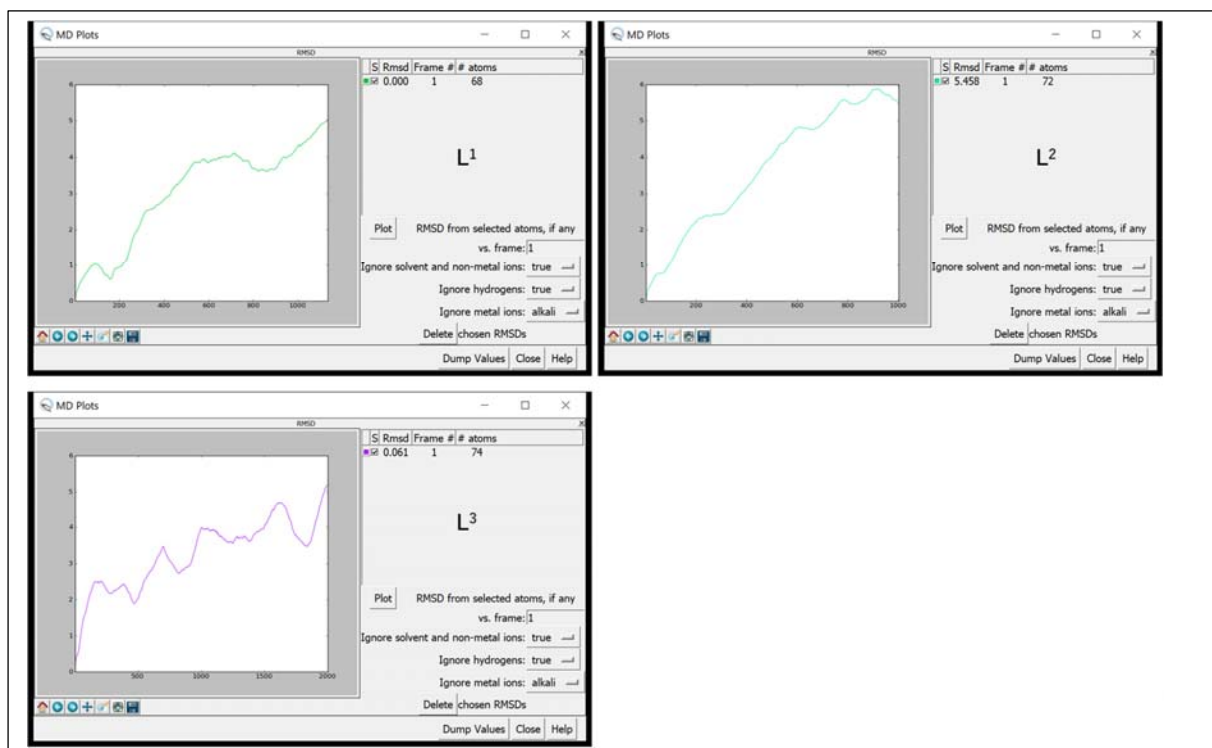

**Figure S18.** Time-dependent RMSD plots for L<sup>1</sup> — L<sup>3</sup>. X and y axis are steps (fs) and time-dependent root-mean-squar-deviation for all atoms, respectively.

## References

S1 S. Y. Kim and J. -I. Hong, Naphthalimide-based fluorescent Zn<sup>2+</sup> chemosensors showing PET effect according to their linker length in water. *Tetrahedron Lett.* 2009, **50**, 2822-2824.

S2 9-(Phenoxymethyl)anthracene was prepared according to the literature. A. M. Sarotti, M. M. Joullie, R. A. Spanevello, and A. G. Suarez, *Org. Lett.*, 2006, **8**, 5561-5564.
